# Supplementary material for: Self-assembly of a 15-nickel metallamacrocyclic complex derived from the l-glutamic acid Schiff base ligand
Source: Royal Society of Chemistry journal article supplement (doi:10.1039/c4dt00257a), 2014-01-01
Supplement: c4dt00257a1.pdf [file c4dt00257a1.pdf]

## Electronic Supplementary Information (ESI)

Self-Assembly of a 15-Nickel Metallamacrocyclic Complex Derived from *L*-  
Glutamic Acid Schiff Base Ligand

Yude Thio, Shi Wei Toh, Feng Xue and Jagadese J Vittal<sup>a</sup>

<sup>a</sup> Corresponding author. Tel.: +65 65162975; fax: +65 67791691.

Email address: [chmjiv@nus.edu.sg](mailto:chmjiv@nus.edu.sg) (J.J. Vittal).

Department of Chemistry, 3 Science Drive 3, National University of Singapore, Singapore 117543, Singapore

**Table S1.** Selected bond lengths [Å] and bond angles [°] for **1a**.

|         |          |           |          |
|---------|----------|-----------|----------|
| Ni1-O3  | 2.035(3) | Ni6-O21   | 2.047(4) |
| Ni1-N1  | 2.012(5) | Ni6-O7W   | 2.094(3) |
| Ni1-O1  | 2.043(3) | Ni6-O8W   | 2.106(4) |
| Ni1-O17 | 2.035(4) | Ni7-N5    | 2.000(5) |
| Ni1-O1W | 2.095(3) | Ni7-O25   | 2.030(3) |
| Ni1-O2W | 2.107(3) | Ni7-O41   | 2.046(4) |
| Ni2-O1  | 2.001(3) | Ni7-O27   | 2.048(3) |
| Ni2-O59 | 2.009(4) | Ni7-O10W  | 2.098(3) |
| Ni2-O18 | 2.016(3) | Ni7-O9W   | 2.085(3) |
| Ni2-O7  | 2.018(3) | Ni8-O31   | 2.003(4) |
| Ni2-O8  | 2.095(4) | Ni8-O25   | 1.993(4) |
| Ni2-O2  | 2.089(3) | Ni8-O23   | 2.017(3) |
| Ni3-N2  | 1.970(5) | Ni8-O42   | 2.007(3) |
| Ni3-O7  | 2.036(3) | Ni8-O26   | 2.099(4) |
| Ni3-O60 | 2.066(4) | Ni8-O32   | 2.099(3) |
| Ni3-O9  | 2.073(3) | Ni9-N6    | 1.980(5) |
| Ni3-O3W | 2.098(3) | Ni9-O24   | 2.027(4) |
| Ni3-O4W | 2.102(3) | Ni9-O31   | 2.030(3) |
| Ni4-O13 | 2.007(4) | Ni9-O33   | 2.065(4) |
| Ni4-N3  | 1.994(5) | Ni9-O11W  | 2.072(3) |
| Ni4-O15 | 2.015(4) | Ni9-O12W  | 2.100(3) |
| Ni4-O29 | 2.048(4) | Ni10-N7   | 2.001(5) |
| Ni4-O6W | 2.123(5) | Ni10-O37  | 1.995(4) |
| Ni4-O5W | 2.107(4) | Ni10-O53  | 2.059(4) |
| Ni5-O11 | 2.005(4) | Ni10-O39  | 2.036(4) |
| Ni5-O19 | 2.016(4) | Ni10-O14W | 2.090(4) |
| Ni5-O30 | 2.014(4) | Ni10-O13W | 2.125(4) |
| Ni5-O13 | 2.029(3) | Ni11-O35  | 2.001(4) |
| Ni5-O14 | 2.094(4) | Ni11-O43  | 2.010(4) |
| Ni5-O20 | 2.072(4) | Ni11-O37  | 2.022(4) |
| Ni6-N4  | 2.012(4) | Ni11-O54  | 2.013(4) |
| Ni6-O12 | 2.024(3) | Ni11-O44  | 2.069(4) |
| Ni6-O19 | 2.039(4) | Ni11-O38  | 2.134(4) |

|           |          |           |          |
|-----------|----------|-----------|----------|
| Ni12-N8   | 1.948(7) | Ni14-O49  | 2.012(4) |
| Ni12-O43  | 2.012(5) | Ni14-O5   | 2.004(4) |
| Ni12-O45  | 2.051(6) | Ni14-O47  | 2.020(4) |
| Ni12-O16W | 2.093(5) | Ni14-O55  | 2.044(4) |
| Ni12-O15W | 2.100(4) | Ni14-O50  | 2.103(5) |
| Ni12-O36  | 2.086(6) | Ni14-O56  | 2.113(4) |
| Ni13-O49  | 2.002(5) | Ni15-N10  | 2.012(5) |
| Ni13-N9   | 2.001(6) | Ni15-O55  | 2.020(4) |
| Ni13-O6   | 2.032(4) | Ni15-O57  | 2.045(4) |
| Ni13-O51  | 2.042(5) | Ni15-O48  | 2.066(5) |
| Ni13-O17W | 2.101(4) | Ni15-O19W | 2.114(4) |
| Ni13-O18W | 2.102(4) | Ni15-O20W | 2.103(5) |

|             |            |             |            |
|-------------|------------|-------------|------------|
| O3-Ni1-N1   | 81.56(16)  | O1-Ni2-O8   | 94.65(14)  |
| O3-Ni1-O1   | 172.90(16) | O59-Ni2-O8  | 178.33(14) |
| N1-Ni1-O1   | 91.47(15)  | O18-Ni2-O8  | 89.60(15)  |
| O3-Ni1-O17  | 88.89(14)  | O7-Ni2-O8   | 77.84(15)  |
| N1-Ni1-O17  | 169.35(14) | O1-Ni2-O2   | 77.93(13)  |
| O1-Ni1-O17  | 98.17(14)  | O59-Ni2-O2  | 90.46(15)  |
| O3-Ni1-O1W  | 93.55(14)  | O18-Ni2-O2  | 177.34(13) |
| N1-Ni1-O1W  | 94.44(15)  | O7-Ni2-O2   | 95.87(13)  |
| O1-Ni1-O1W  | 85.62(12)  | O8-Ni2-O2   | 89.27(15)  |
| O17-Ni1-O1W | 90.82(14)  | N2-Ni3-O7   | 91.51(16)  |
| O3-Ni1-O2W  | 90.53(14)  | N2-Ni3-O60  | 168.79(15) |
| N1-Ni1-O2W  | 89.37(16)  | O7-Ni3-O60  | 99.29(14)  |
| O1-Ni1-O2W  | 90.73(13)  | N2-Ni3-O9   | 81.42(17)  |
| O17-Ni1-O2W | 86.00(15)  | O7-Ni3-O9   | 172.90(16) |
| O1W-Ni1-O2W | 174.78(14) | O60-Ni3-O9  | 87.81(15)  |
| O1-Ni2-O59  | 86.91(14)  | N2-Ni3-O3W  | 92.04(15)  |
| O1-Ni2-O18  | 99.77(13)  | O7-Ni3-O3W  | 85.05(13)  |
| O59-Ni2-O18 | 90.74(14)  | O60-Ni3-O3W | 91.89(15)  |
| O1-Ni2-O7   | 170.43(14) | O9-Ni3-O3W  | 94.46(13)  |
| O59-Ni2-O7  | 100.54(14) | N2-Ni3-O4W  | 90.77(15)  |
| O18-Ni2-O7  | 86.24(13)  | O7-Ni3-O4W  | 91.70(13)  |

|             |            |              |            |
|-------------|------------|--------------|------------|
| O60-Ni3-O4W | 85.93(15)  | N4-Ni6-O19   | 92.0(2)    |
| O9-Ni3-O4W  | 89.09(13)  | O12-Ni6-O19  | 97.99(15)  |
| O3W-Ni3-O4W | 175.77(13) | N4-Ni6-O21   | 80.4(2)    |
| O13-Ni4-N3  | 92.5(2)    | O12-Ni6-O21  | 89.70(15)  |
| O13-Ni4-O15 | 173.08(15) | O19-Ni6-O21  | 172.30(15) |
| N3-Ni4-O15  | 80.6(2)    | N4-Ni6-O7W   | 92.25(16)  |
| O13-Ni4-O29 | 99.32(15)  | O12-Ni6-O7W  | 91.88(13)  |
| N3-Ni4-O29  | 167.9(2)   | O19-Ni6-O7W  | 85.72(15)  |
| O15-Ni4-O29 | 87.60(16)  | O21-Ni6-O7W  | 93.67(15)  |
| O13-Ni4-O6W | 88.69(18)  | N4-Ni6-O8W   | 88.54(18)  |
| N3-Ni4-O6W  | 89.08(19)  | O12-Ni6-O8W  | 88.03(16)  |
| O15-Ni4-O6W | 91.56(19)  | O19-Ni6-O8W  | 90.16(18)  |
| O29-Ni4-O6W | 88.39(18)  | O21-Ni6-O8W  | 90.49(18)  |
| O13-Ni4-O5W | 86.04(15)  | O7W-Ni6-O8W  | 175.84(18) |
| N3-Ni4-O5W  | 92.73(17)  | N5-Ni7-O10W  | 89.47(16)  |
| O15-Ni4-O5W | 93.86(16)  | O25-Ni7-O10W | 91.39(13)  |
| O29-Ni4-O5W | 90.89(15)  | O41-Ni7-O10W | 86.86(16)  |
| O6W-Ni4-O5W | 174.50(17) | O27-Ni7-O10W | 90.50(13)  |
| O19-Ni5-O30 | 85.30(14)  | N5-Ni7-O9W   | 92.69(16)  |
| O11-Ni5-O13 | 85.45(14)  | O25-Ni7-O9W  | 85.33(13)  |
| O19-Ni5-O13 | 171.37(16) | O41-Ni7-O9W  | 91.61(15)  |
| O30-Ni5-O13 | 100.21(15) | O27-Ni7-O9W  | 93.00(13)  |
| O11-Ni5-O14 | 91.24(17)  | O10W-Ni7-O9W | 176.13(14) |
| O19-Ni5-O14 | 96.22(16)  | N5-Ni7-O25   | 92.25(16)  |
| O30-Ni5-O14 | 176.57(18) | N5-Ni7-O41   | 168.65(15) |
| O13-Ni5-O14 | 77.92(16)  | O25-Ni7-O41  | 98.57(15)  |
| O11-Ni5-O20 | 176.51(18) | N5-Ni7-O27   | 80.96(17)  |
| O19-Ni5-O20 | 77.14(18)  | O25-Ni7-O27  | 172.94(17) |
| O30-Ni5-O20 | 91.41(18)  | O41-Ni7-O27  | 88.33(16)  |
| O13-Ni5-O20 | 95.98(17)  | O31-Ni8-O25  | 170.33(14) |
| O14-Ni5-O20 | 86.0(2)    | O31-Ni8-O23  | 99.49(14)  |
| O11-Ni5-O19 | 101.13(15) | O25-Ni8-O23  | 87.03(14)  |
| O11-Ni5-O30 | 91.47(14)  | O31-Ni8-O42  | 87.47(15)  |
| N4-Ni6-O12  | 169.49(19) | O25-Ni8-O42  | 99.69(14)  |

|               |            |                |            |
|---------------|------------|----------------|------------|
| O23-Ni8-O42   | 90.43(14)  | O39-Ni10-O14W  | 90.30(18)  |
| O31-Ni8-O26   | 93.36(16)  | N7-Ni10-O13W   | 91.02(16)  |
| O25-Ni8-O26   | 79.29(15)  | O37-Ni10-O13W  | 85.75(16)  |
| O23-Ni8-O26   | 91.08(15)  | O53-Ni10-O13W  | 90.35(16)  |
| O42-Ni8-O26   | 178.13(15) | O39-Ni10-O13W  | 93.33(16)  |
| O31-Ni8-O32   | 78.65(15)  | O14W-Ni10-O13W | 175.37(17) |
| O25-Ni8-O32   | 94.62(15)  | O35-Ni11-O43   | 101.15(17) |
| O23-Ni8-O32   | 177.53(14) | O35-Ni11-O37   | 85.38(16)  |
| O42-Ni8-O32   | 91.11(14)  | O43-Ni11-O37   | 171.67(17) |
| O26-Ni8-O32   | 87.42(16)  | O35-Ni11-O54   | 90.55(16)  |
| N6-Ni9-O24    | 168.51(15) | O43-Ni11-O54   | 84.86(16)  |
| N6-Ni9-O31    | 91.71(16)  | O37-Ni11-O54   | 100.37(15) |
| O24-Ni9-O31   | 98.94(15)  | O35-Ni11-O44   | 177.63(18) |
| N6-Ni9-O33    | 80.14(17)  | O43-Ni11-O44   | 77.72(18)  |
| O24-Ni9-O33   | 89.28(16)  | O37-Ni11-O44   | 95.56(17)  |
| O31-Ni9-O33   | 171.76(17) | O54-Ni11-O44   | 91.41(17)  |
| N6-Ni9-O11W   | 94.17(16)  | O35-Ni11-O38   | 91.24(16)  |
| O24-Ni9-O11W  | 91.01(15)  | O43-Ni11-O38   | 96.82(17)  |
| O31-Ni9-O11W  | 85.36(13)  | O37-Ni11-O38   | 77.72(16)  |
| O33-Ni9-O11W  | 94.01(15)  | O54-Ni11-O38   | 177.26(16) |
| N6-Ni9-O12W   | 90.03(16)  | O44-Ni11-O38   | 86.85(17)  |
| O24-Ni9-O12W  | 85.52(15)  | N8-Ni12-O43    | 94.9(3)    |
| O31-Ni9-O12W  | 90.82(14)  | N8-Ni12-O45    | 80.3(3)    |
| O33-Ni9-O12W  | 90.36(14)  | O43-Ni12-O45   | 174.9(2)   |
| O11W-Ni9-O12W | 174.39(16) | N8-Ni12-O16W   | 90.1(3)    |
| N7-Ni10-O37   | 92.24(18)  | O43-Ni12-O16W  | 92.4(2)    |
| N7-Ni10-O53   | 169.31(19) | O45-Ni12-O16W  | 89.2(2)    |
| O37-Ni10-O53  | 98.43(17)  | N8-Ni12-O15W   | 91.3(2)    |
| N7-Ni10-O39   | 80.74(18)  | O43-Ni12-O15W  | 87.69(16)  |
| O37-Ni10-O39  | 172.92(16) | O45-Ni12-O15W  | 90.8(2)    |
| O53-Ni10-O39  | 88.59(17)  | O16W-Ni12-O15W | 178.6(2)   |
| N7-Ni10-O14W  | 92.40(18)  | N8-Ni12-O36    | 169.3(3)   |
| O37-Ni10-O14W | 91.00(17)  | O43-Ni12-O36   | 95.50(18)  |
| O53-Ni10-O14W | 86.86(19)  | O45-Ni12-O36   | 89.4(3)    |

|                |            |                |            |
|----------------|------------|----------------|------------|
| O16W-Ni12-O36  | 86.8(2)    | O5-Ni14-O50    | 175.78(18) |
| O15W-Ni12-O36  | 91.78(18)  | O47-Ni14-O50   | 93.18(19)  |
| O49-Ni13-N9    | 91.9(2)    | O55-Ni14-O50   | 94.49(18)  |
| O49-Ni13-O6    | 97.81(17)  | O49-Ni14-O56   | 93.93(16)  |
| N9-Ni13-O6     | 169.7(2)   | O5-Ni14-O56    | 89.54(16)  |
| O49-Ni13-O51   | 172.17(19) | O47-Ni14-O56   | 179.17(18) |
| N9-Ni13-O51    | 80.4(2)    | O55-Ni14-O56   | 78.37(16)  |
| O6-Ni13-O51    | 89.97(19)  | O50-Ni14-O56   | 87.01(18)  |
| O49-Ni13-O17W  | 86.44(16)  | N10-Ni15-O55   | 91.05(18)  |
| N9-Ni13-O17W   | 91.66(18)  | N10-Ni15-O57   | 82.02(19)  |
| O6-Ni13-O17W   | 92.23(15)  | O55-Ni15-O57   | 173.06(17) |
| O51-Ni13-O17W  | 92.42(17)  | N10-Ni15-O48   | 170.16(18) |
| O49-Ni13-O18W  | 90.02(19)  | O55-Ni15-O48   | 98.59(17)  |
| N9-Ni13-O18W   | 88.16(19)  | O57-Ni15-O48   | 88.35(17)  |
| O6-Ni13-O18W   | 88.54(17)  | N10-Ni15-O19W  | 91.53(17)  |
| O51-Ni13-O18W  | 91.04(19)  | O55-Ni15-O19W  | 86.82(16)  |
| O17W-Ni13-O18W | 176.5(2)   | O57-Ni15-O19W  | 93.09(18)  |
| O49-Ni14-O5    | 98.94(17)  | O48-Ni15-O19W  | 90.96(19)  |
| O49-Ni14-O47   | 86.91(16)  | N10-Ni15-O20W  | 91.2(2)    |
| O5-Ni14-O47    | 90.30(17)  | O55-Ni15-O20W  | 90.43(19)  |
| O49-Ni14-O55   | 170.17(16) | O57-Ni15-O20W  | 90.0(2)    |
| O5-Ni14-O55    | 87.20(16)  | O48-Ni15-O20W  | 86.8(2)    |
| O47-Ni14-O55   | 100.81(16) | O19W-Ni15-O20W | 176.14(17) |
| O49-Ni14-O50   | 78.89(19)  |                |            |

---

**Table S2.** Hydrogen bond parameters for **1a**.

| D—H...A                        | d(D-H)/Å  | d(H...A)/Å | d(D...A)/Å | <DHA/°    |
|--------------------------------|-----------|------------|------------|-----------|
| O1W—H1WA...O59                 | 0.90(2)   | 1.93(3)    | 2.793(5)   | 161(3)    |
| O2W—H2WB...O28 <sup>a,b</sup>  | 0.90(2)   | 1.96(2)    | 2.858(6)   | 175(3)    |
| O3W—H3WA...O18                 | 0.90(2)   | 2.35(3)    | 2.783(5)   | 109.4(18) |
| O5W—H5WA...O11                 | 0.90(3)   | 1.94(3)    | 2.752(5)   | 149(3)    |
| O10W—H10B...O4 <sup>a,b</sup>  | 0.90(4)   | 1.92(4)    | 2.818(6)   | 177(2)    |
| O11W—H11J...O42                | 0.90(3)   | 1.94(3)    | 2.798(5)   | 159(3)    |
| O12W—H12K...O10 <sup>c,d</sup> | 0.90(3)   | 1.92(3)    | 2.818(6)   | 180(4)    |
| O7W—H7WA...O30                 | 0.900(18) | 2.00(2)    | 2.791(5)   | 146(3)    |
| O17W—H17A...O47                | 0.90(3)   | 2.02(3)    | 2.808(6)   | 145(4)    |
| O9W—H9WB...O23                 | 0.90(2)   | 2.01(3)    | 2.789(5)   | 144(3)    |
| O19W—H19A...O5                 | 0.90(2)   | 1.89(2)    | 2.757(6)   | 160(3)    |

Symmetry transformations used to generate equivalent atoms: a = -x,y-1/2,-z+1; b = -x,y+1/2,-z+1; c = -x+1,y-1/2,-z+1; d = -x+1,y+1/2,-z+1.

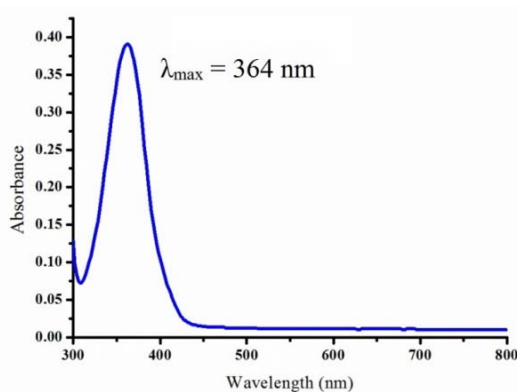

**Figure S1.** UV spectrum of **1** in MeOH.

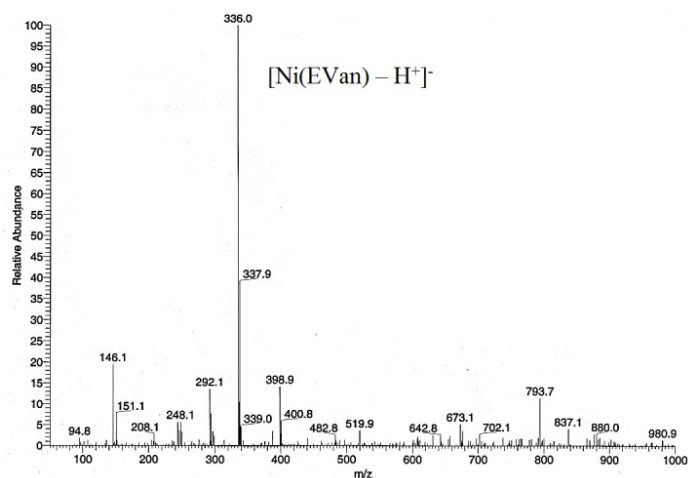

**Figure S2.** ESI-MS spectrum of **1**.

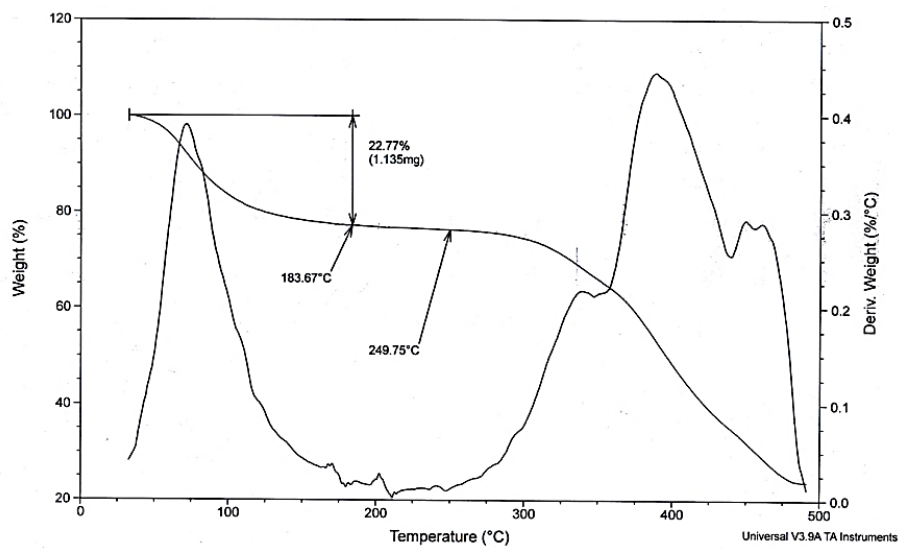

Figure S3. TGA profile of 1.
